# Supplementary material for: Ancient and recent introgression shape the evolutionary history of pollinator adaptation and speciation in a model monkeyflower radiation (Mimulus section Erythranthe)
Source: PLoS Genet. 2021 Feb 22;17(2):e1009095. doi: 10.1371/journal.pgen.1009095 (PMC7951852; doi:10.1371/journal.pgen.1009095)
Supplement: S1 Table — With the exception of the Vickery accession of M. rupestris, all sequenced individuals were wild-collected as seeds and greenhouse-grown for tissue collection. The M. bicolor sample was pooled wild-collected DNA from a large population in the center of the species range. A text version of this table is available at https://github.com/thomnelson/MimulusPhylogenomics/blob/main/Data/lewcardgroup_collectiontable_2021-02-06.csv. (XLSX) [file pgen.1009095.s019.xlsx]

## Sheet: Sheet1
Species	Name	Code	CodeNumeric	Latitude	Longitude	Source	Date
M. cardinalis	O’Neil Creek	ONC	1	41.8098	-123.119	A. Angert	ND
M. cardinalis	Indian Creek	IND	2	40.6574	-122.913	A. Stathos	2010
M. cardinalis	Slate Creek	SLA	3	39.5836	-121.062	A. Stathos	2010
M. cardinalis	Carlon CARD (Tuolumne)	CAR-C	4	37.8124	-119.859	A. Stathos	2010
M. cardinalis	Redwood Creek	RED	5	36.7048	-118.915	A. Stathos	2010
M. cardinalis	Manzana Creek	MNZ	6	34.7717	-119.944	A. Angert	2010
M. cardinalis	Arroyo Sequit	ARS	7	34.0651	-118.933	A. Angert	2010
M. cardinalis	W. Fork Mojave	WFM	8	34.2843	-117.375	A. Angert	2010
M. cardinalis	Cuyamaca Rancho	CUY	9	32.8991	-116.587	A. Angert	2010
M. cardinalis	Cedros Island	CED	10	28.296	-115.215	R. Vickery	1994
M. cardinalis	Summerhaven	SHV	11	32.4449	-110.761	A. Stathos	2011
M. cardinalis	Mt. Graham	GRM	12	32.6925	-109.9	A. Stathos	2011
M. lewisii	10-Mile	10M	0	44.3971	-122.131	J.& L. Sobel	2010
M. lewisii	Spruce Camp	SPC	1	44.5827	-114.416	T. Mitchell-Olds	2010
M. lewisii	Lonestar Trail	YLS	2	44.4412	-110.804	M. Hendrick	2010
M. lewisii	Eureka Peak (Lew	LH	3	39.7526	-120.748	A. Stathos	2010
M. lewisii	Jackson Creek	JAC	4	39.4576	-120.603	A. Stathos	2010
M. lewisii	Pilot Peak	PPK	5	39.7848	-120.864	A. Stathos	2010
M. lewisii	Carlon LEW (Tuolumne)	Car-L	6	37.8124	-119.859	A. Stathos	2010
M. lewisii	Snow Creek	SNO	7	37.8185	-119.509	A. Stathos	2010
M. lewisii	High Sierra Trail	HST	8	36.5566	-118.72	A. Stathos	2010
M. parishii	Lower Covington Flats	PAR1366	NA	34.0211	-116.296	S. Sheth	2010
M. parishii	Granite Cove Spring	PAR1490	NA	34.7858	-115.659	S. Sheth	2010
M. rupestris	Cliffs of Sierra de Tepoztlan	RUP	NA	19.001	-99.1012	R. Vickery	ND
M. verbenaceus	West Fork Oak Creek	V480	NA	34.9931	-111.749	S.Sheth	2009
M. eastwoodiae	Canyon de Chelly	E697	NA	36.1292	-109.454	S. Sheth	2009
M. bicolor	Pinecrest (population pool)	BIC	NA	38.094	-120.155	B. Kern	2015

## Sheet: sites elevation
Site	elevation (m)
CH1	1770
A-tree	1860
LH1	1995
LH2	1950-2100
PES	1675
PPK	2070
SLA	975
JAM	1524-1554
BRR
CAR
DON
FAL
HST
IND
JAC	1720
LDG
LYC
NYR
PAS
R18
RAP
RED
SNO
SYR
WAW
YLS
